# Supplementary material
Source: Research Square preprint supplement (doi:10.21203/rs.3.rs-10138075/v1)

**Graphical Abstract**

| **(a)** | **(b)** | | **(c)** | |
| --- | --- | --- | --- | --- |
| 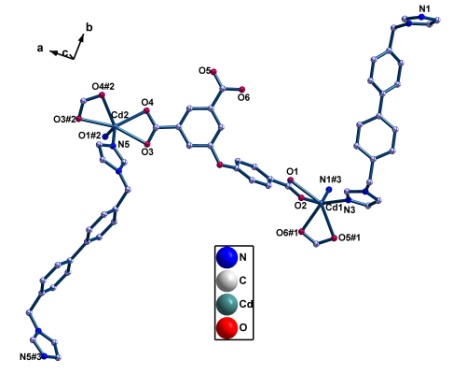 | 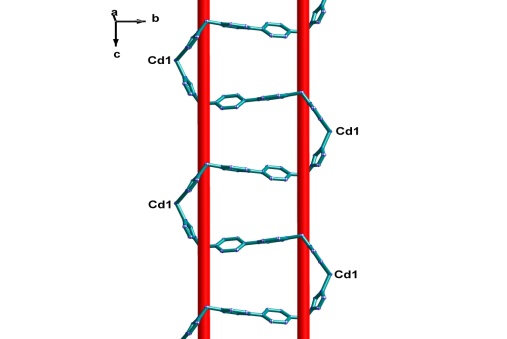 | | 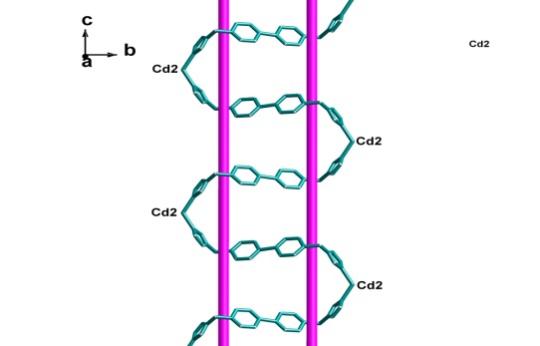 | |
| 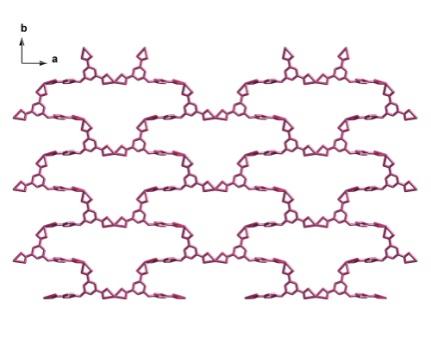 | 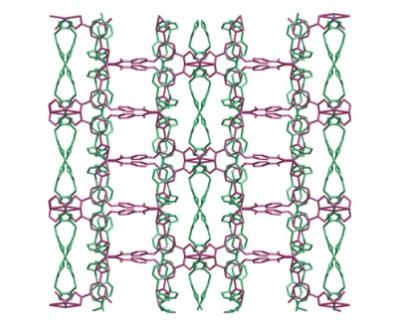 | | 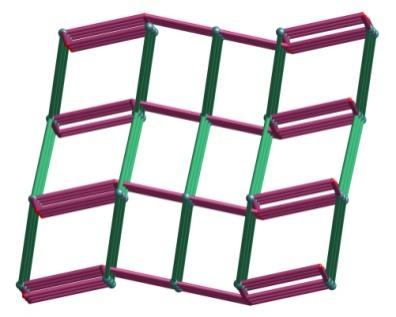 | |
| **(a)** | | | **(b)** | |
| 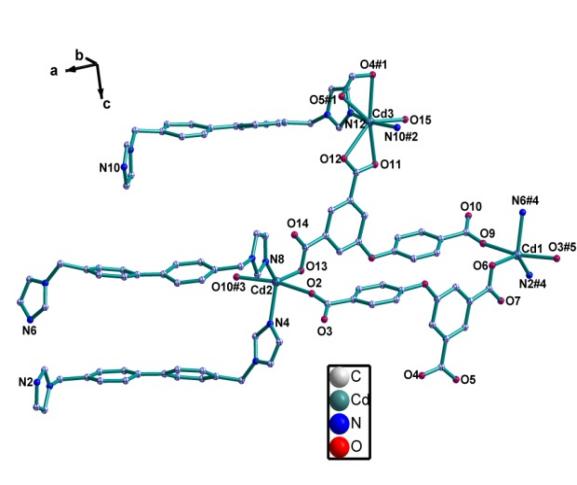 | | | 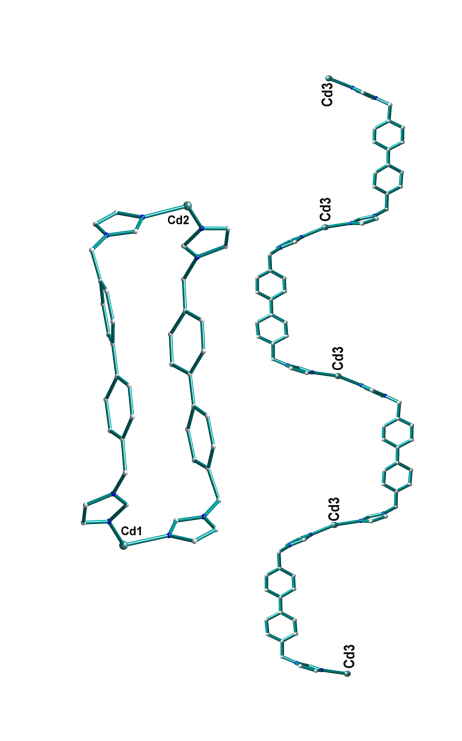 | |
| **(a)** | | | **(b)** | |
| 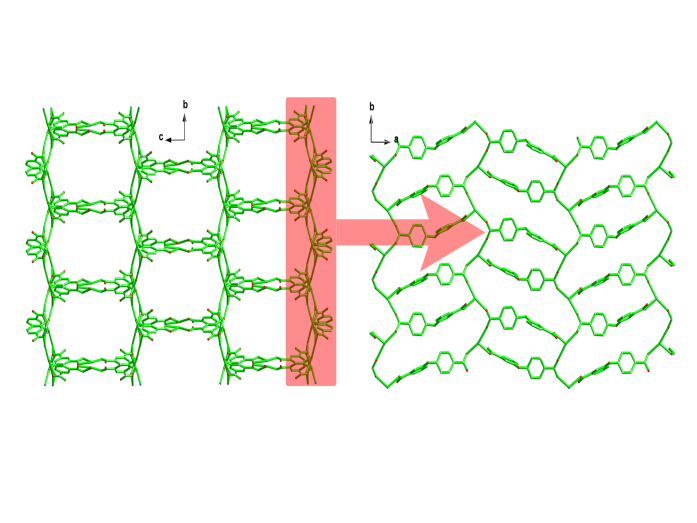 | | | 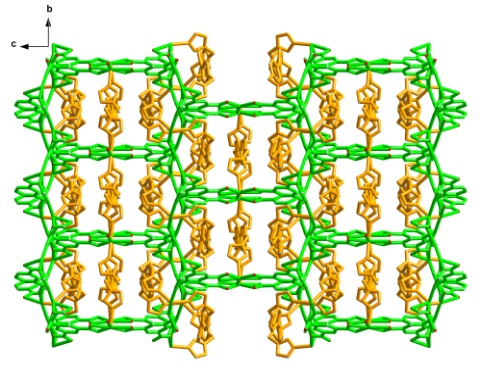 | |

Supplement: Supplementary file 1 [file 06286d669250817fc6482462.docx]
